# Supplementary material
Source: publisher figshare collection journal article supplement (https://tandf.figshare.com/articles/dataset/_/4234181)

**A**

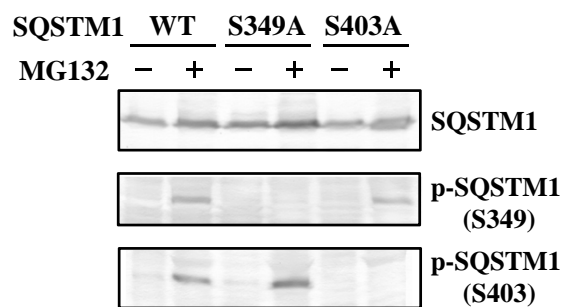

**B**

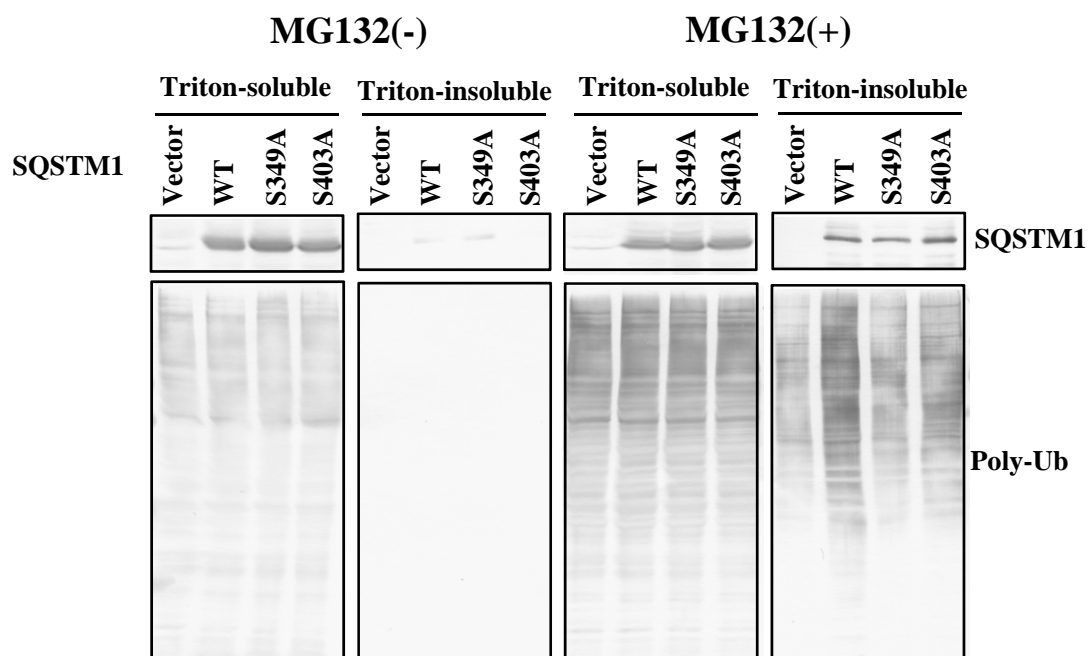

**C**

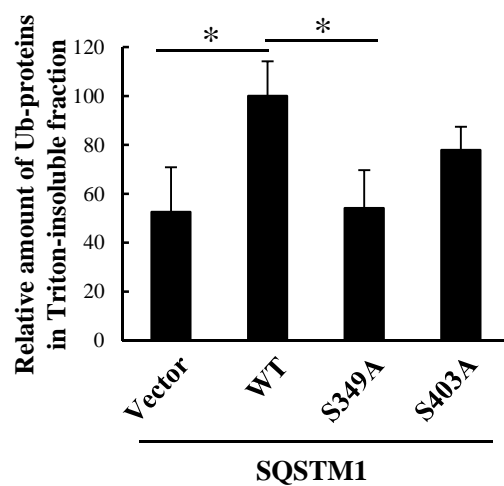

Supplement: Supplementary file 1 [file 1]

**A**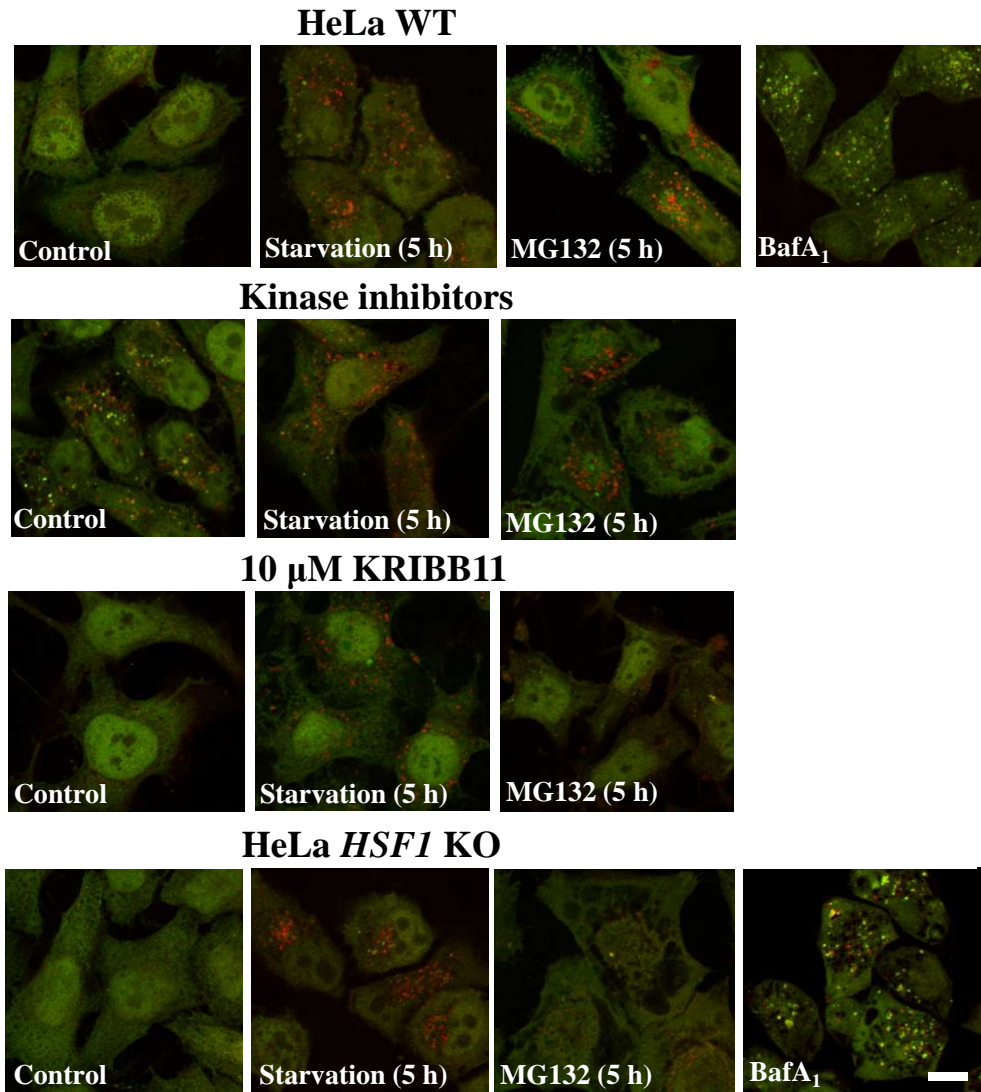**B**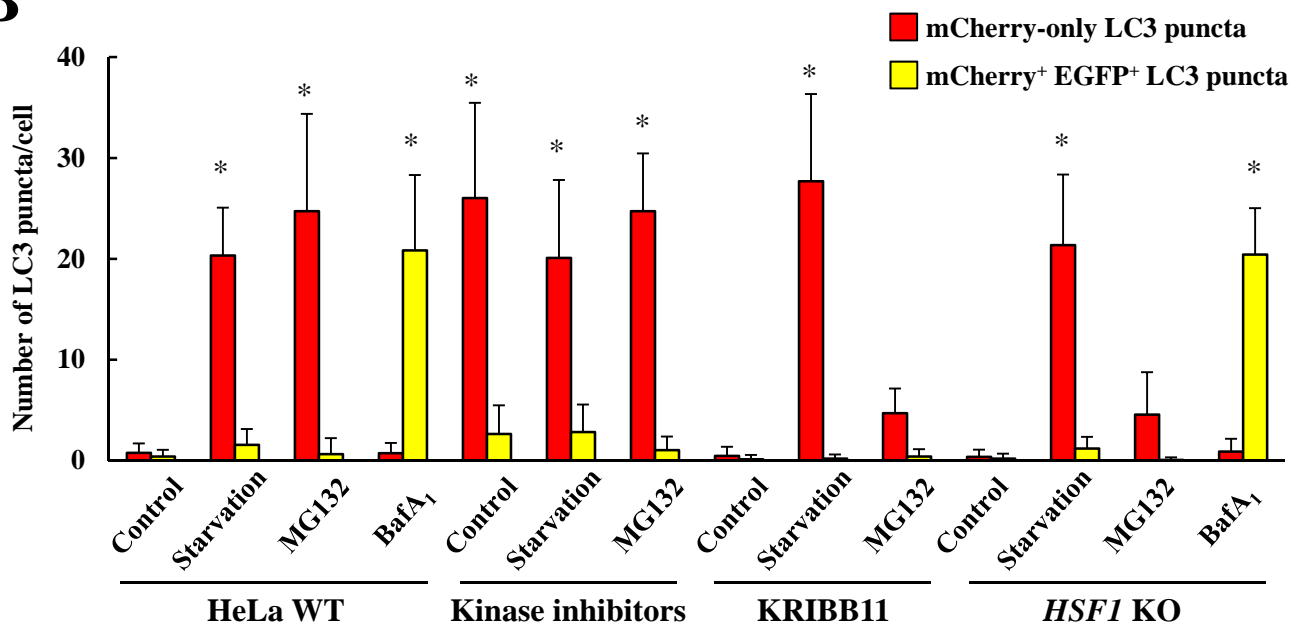

Supplement: Supplementary file 2 [file 1]

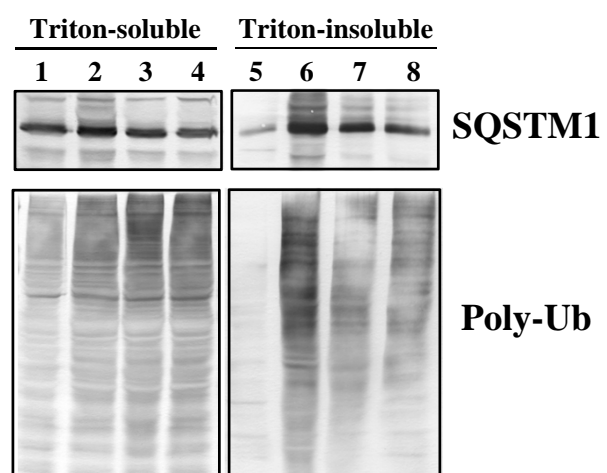

Supplement: Supplementary file 3 [file 1]

**A**

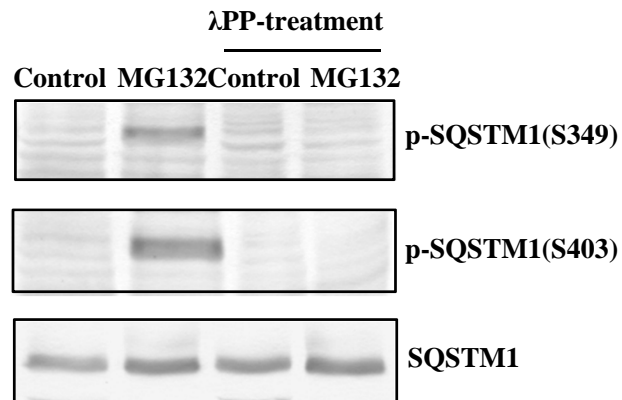

**B**

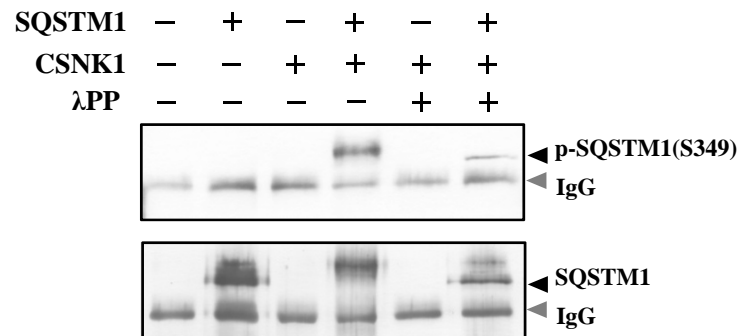

Supplement: Supplementary file 4 [file 1]

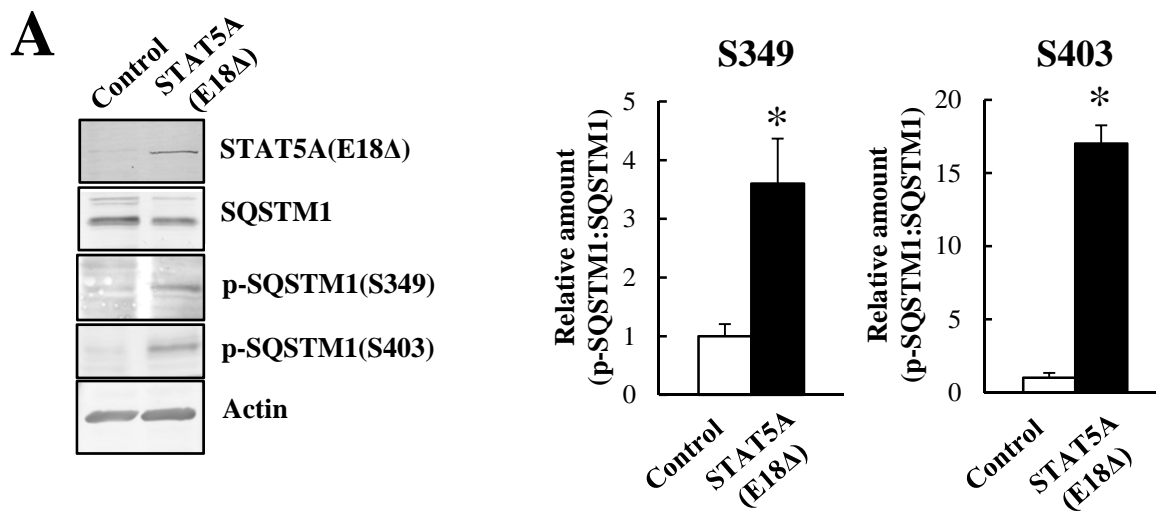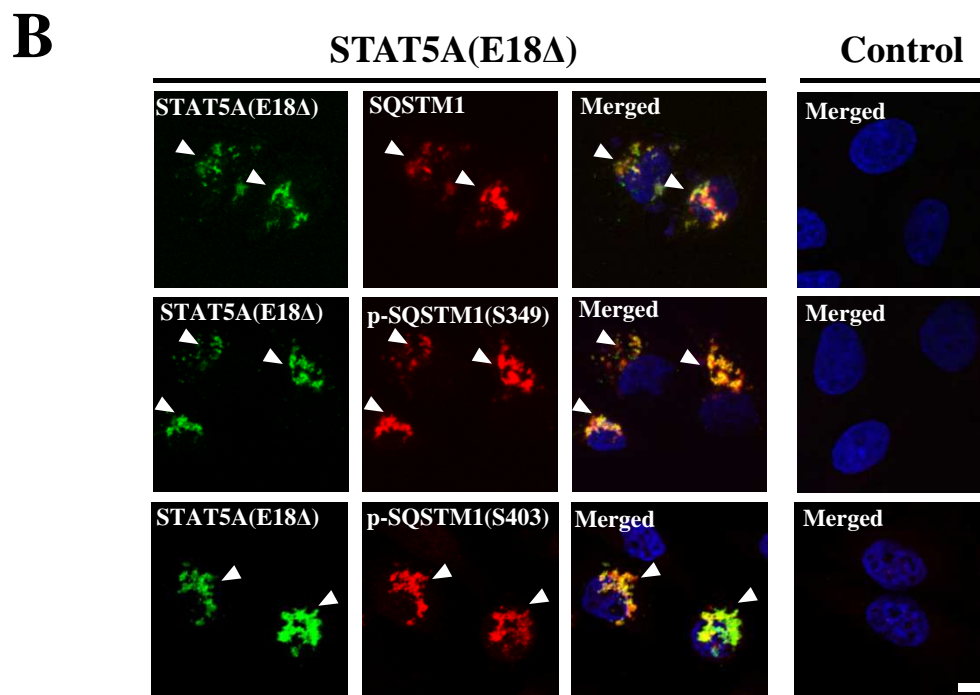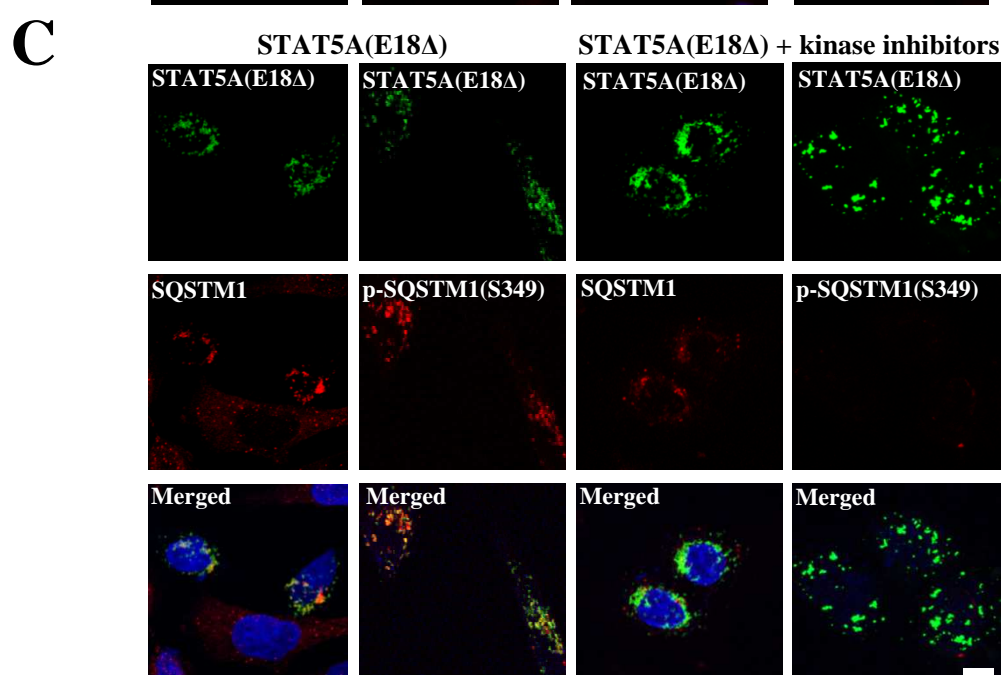

Supplement: Supplementary file 5 [file 1]

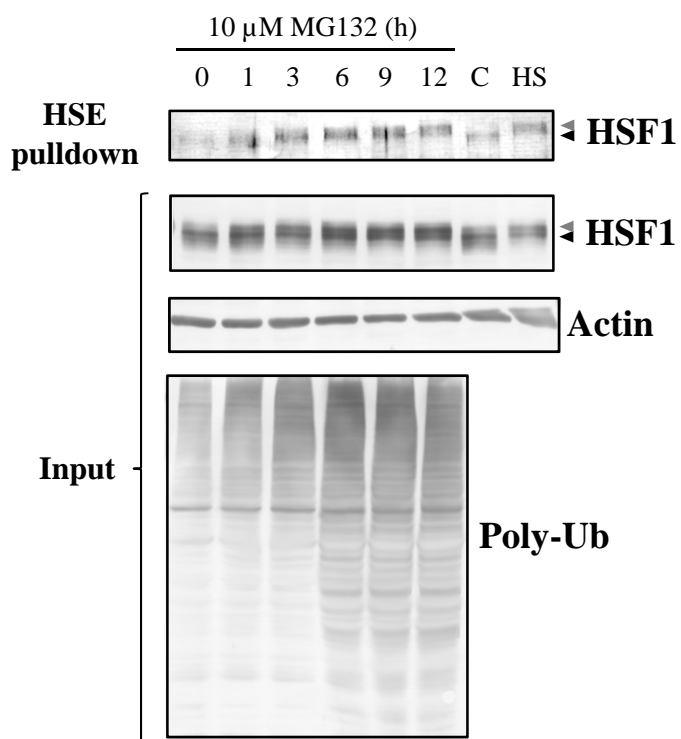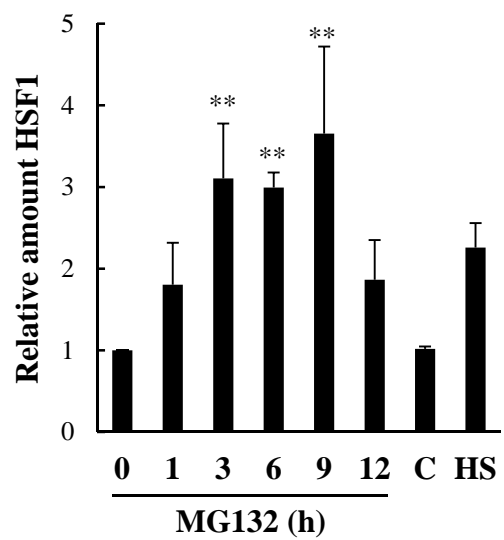

Supplement: Supplementary file 6 [file 1]

***HSF1* KO HeLa (MG132)**

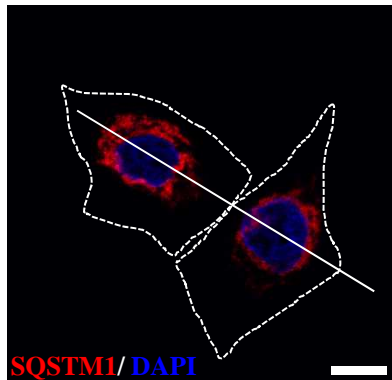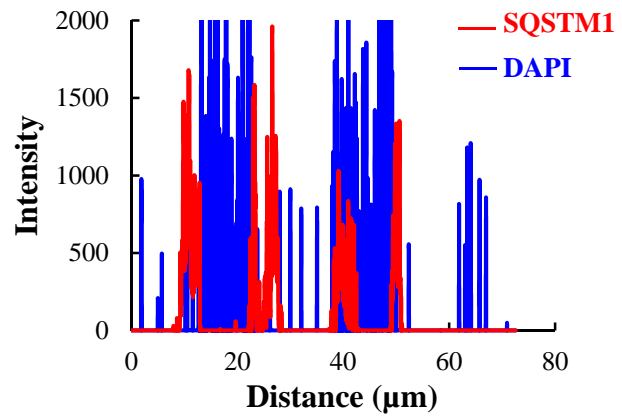

***HSF1* KO HeLa (MG132 + KRIBB11)**

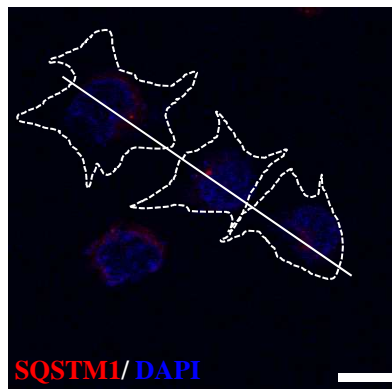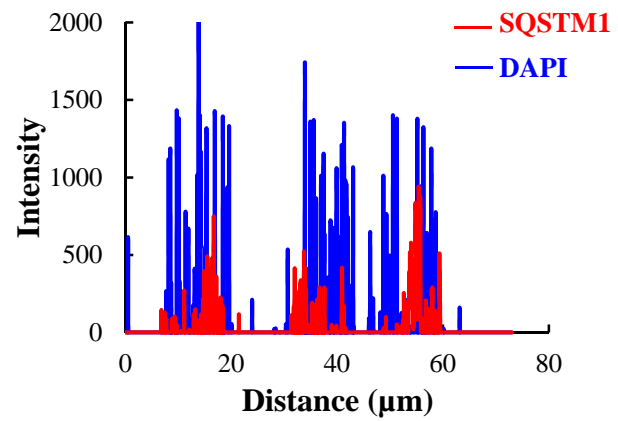

**HeLa WT (MG132 + KRIBB11)**

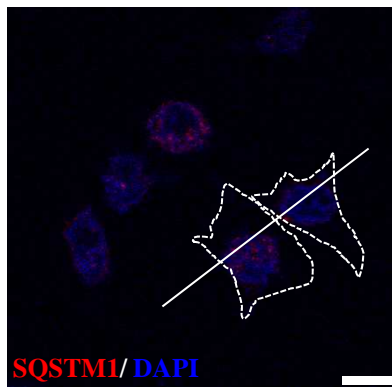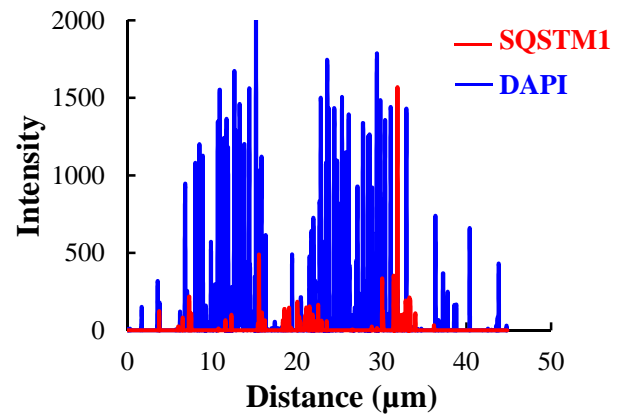

Supplement: Supplementary file 7 [file 1]

**A**

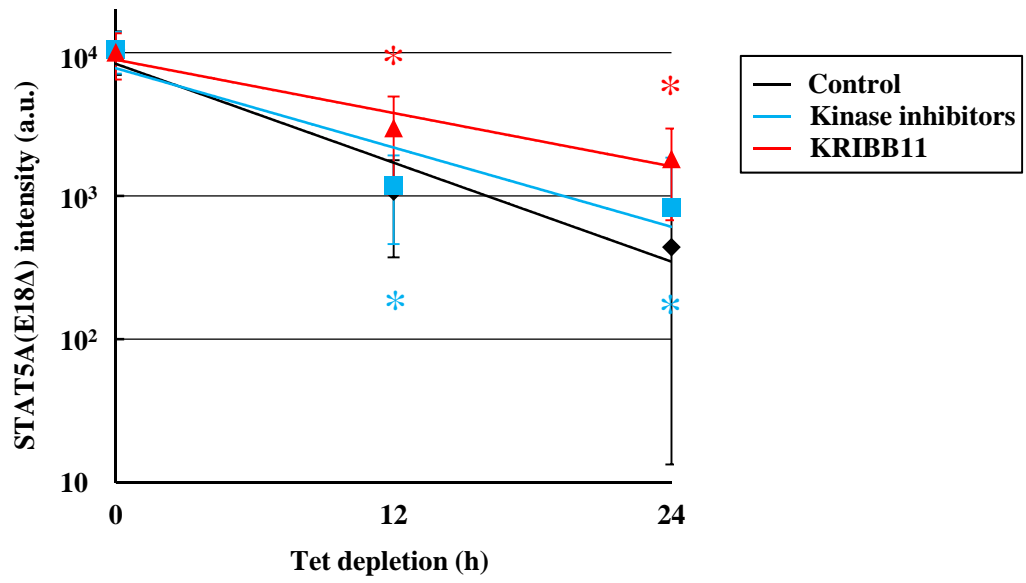

**B**

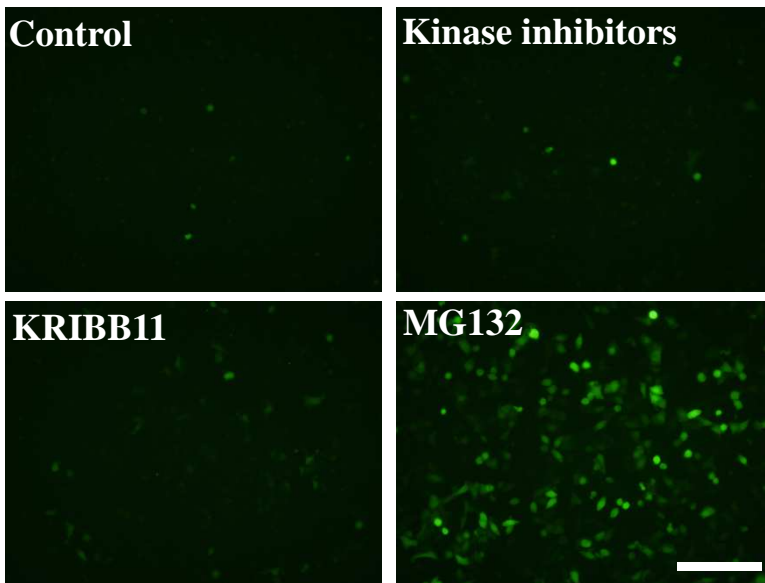

**C**

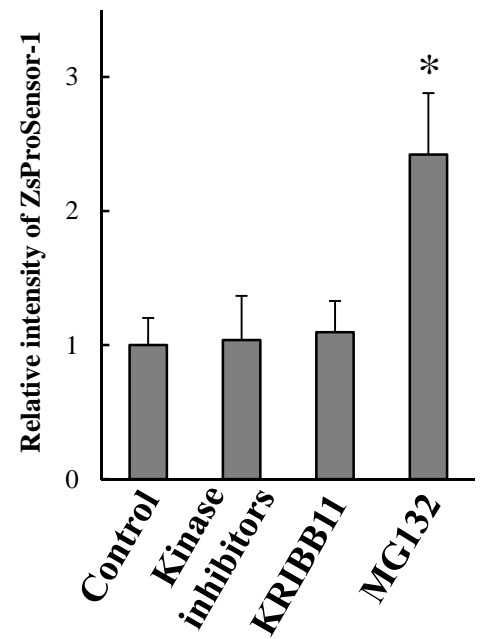

Supplement: Supplementary file 8 [file 1]
